# Supplementary material
Source: publisher figshare collection journal article supplement (https://wiley.figshare.com/articles/dataset/_/3521471)
Supplement: Supplementary file 1 [file 1]

## SUPPLEMENTAL MATERIAL

### Appendix A

Fitted equations for relationships between each parameter and adult density and climate (Table 1), and details of the matrix population model (Fig. 1).

#### Vital rates

*Germination rate (Figure 2b)*

$$Germ = Germ_{max} (t^n / (t^n + K^n)) \quad \text{Eq. A.1}$$

with  $Germ_{max} = 1$ ,  $n = 4$ ,  $K = 3$ , and  $t$  the number of times per year when soil moisture is above field capacity ( $> 130\text{mm}$ ) for three consecutive days.

*Seedling survival rate (Figure 2c)*

$$S_{sg} = S_{sgmax} (t^n / (t^n + K^n)), \quad \text{Eq. A.2}$$

with  $S_{sgmax} = 0.5$ ,  $n = 8$ ,  $K = 4.1$ , and  $t$  the number of times per year when soil moisture is above field capacity ( $> 130\text{mm}$ ) for seven consecutive days.

*Sapling survival rate for isolated to sparse density populations (Fig. 2d)*

$$S_{sap} = 0.025t + 0.02 \quad \text{Eq. A.3}$$

with  $t$  the number of days per year where soil moisture is above field capacity ( $> 130\text{mm}$ ).

*Sapling growth rate (Fig. 2e)*

$$G_{sap,t} = G_{max,sap,t} e^{(-cd)}, \quad \text{Eq. A.4}$$

with  $G_{max,sap} = 1$ ,  $c = 0.003$  and  $d$  is the summed density of small and large adult trees.

*Growth rates of small juveniles (SJ), large juveniles (LJ) and small adults (SA) (Fig. 2e)*

$$G_{i,t} = G_{max,i,t} (1 - d^n / (d^n + K^n)) \quad \text{Eq. A.5}$$

with  $n = 4$ ,  $K = 1500$ ,  $i \in [SJ, LJ, SA]$ , with  $G_{max,SJ} = 0.55$  or  $G_{max,LJ} = G_{max,SA} = 0.06$ , and  $d$  is the summed density of small and large adult trees.

*Retrogression rates of large juveniles (LA), small adults (SA) and large adults (LA) (Fig. 2e)*

$$R_{i,t} = R_{min,t} + R_{max,t} (1 - e^{(-cd)}) \quad \text{Eq. A.6}$$

with  $R_{LJ,t} = R_{SA,t} = R_{LA,t}$ , the minimum and maximum retrogression rate observed  $R_{min} = 0.02$ ,  $R_{max} = 0.12$ ,  $c = 0.003$ , and  $d$  is the summed density of small and large adult trees.

*Fertility rate of small adults (SA) and large adults (LA) (Fig. 2f)*

$$f_{d,i} = p_{max,i} m (1 - d^n / (d^n + K^n)) \quad \text{Eq. A.7}$$

with  $i \in [SA, LA]$ ,  $n = 3$ ,  $K = 1500$ , pre-dispersal mortality rate  $m = 0.25$ , the maximum fertility rate of small adults  $p_{max,SA} = 20.75$  or large adults  $p_{max,LA} = 63.6$ , and  $d$  is the summed density of small and large adult trees.

### **Detail of the matrix population model**

The model projects at an annual-time step the population dynamics at different life-stages through a  $(6 \times 6)$  transition matrix  $A$  (Pichancourt et al., 2012):

$$\vec{N}_{t+1}^{a,d} = A \cdot \vec{N}_t \Leftrightarrow \begin{pmatrix} n^{SB} \\ n^{Sap} \\ n^{SJ} \\ n^{LJ} \\ n^{SA} \\ n^{LA} \end{pmatrix}_{t+1} = A \cdot \begin{pmatrix} n^{SB} \\ n^{Sap} \\ n^{SJ} \\ n^{LJ} \\ n^{SA} \\ n^{LA} \end{pmatrix}_t \quad \text{Eq. A.8}$$

where  $A$  contains the vital rates (Table 1) at the different life-stages and size-classes:

$$A = \begin{pmatrix} S_{SB}(1-Germ) & 0 & 0 & 0 & \sqrt{S_{SA}f_{SA}}\sqrt{S_{SB}(1-d)(1-Germ)} & \sqrt{S_{LA}f_{LA}}\sqrt{S_{SB}(1-d)(1-Germ)} \\ S_{SB}Germ.S_{Sg} & S_{Sap}(1-G_{Sap}) & 0 & 0 & \sqrt{S_{SA}f_{SA}}\sqrt{S_{SB}(1-d)Germ.S_{Sg}} & \sqrt{S_{LA}f_{LA}}\sqrt{S_{SB}(1-d)Germ.S_{Sg}} \\ 0 & S_{Sap}G_{Sap} & S_{SJ}(1-G_{SJ}) & S_{LJ}(1-G_{LJ})R_{LJ} & 0 & 0 \\ 0 & 0 & S_{SJ}G_{SJ} & S_{LJ}(1-G_{LJ})(1-R_{LJ}) & S_{SA}(1-G_{SA})R_{SA} & 0 \\ 0 & 0 & 0 & S_{LJ}G_{LJ} & S_{SA}(1-G_{SA})(1-R_{SA}) & S_{LA}R_{LA} \\ 0 & 0 & 0 & 0 & S_{SA}G_{SA} & S_{LA}(1-R_{LA}) \end{pmatrix}$$

Eq. A.9

## LITERATURE CITED

Pichancourt, J. B., I. Chades, J. Firm, R. D. van Klinken, and T. G. Martin. 2012. Simple rules to contain an invasive species with a complex life cycle and high dispersal capacity. *Journal of Applied Ecology* **49**:52-62.
